# Supplementary material for: Free-standing 2D non-van der Waals antiferromagnetic hexagonal FeSe semiconductor: halide-assisted chemical synthesis and Fe2+ related magnetic transitions
Source: Royal Society of Chemistry journal article supplement (doi:10.1039/d1sc04122c), 2021-12-01
Supplement: d1sc04122c1.pdf [file d1sc04122c1.pdf]

## Free-standing 2D non-van der Waals antiferromagnetic hexagonal FeSe semiconductor: halide-assisted chemical synthesis and Fe<sup>2+</sup> related magnetic transitions

Junjie Xu,<sup>a</sup> Wei Li,<sup>a</sup> Biao Zhang,<sup>a</sup> Liang Zha,<sup>b</sup> Wei Hao,<sup>c</sup> Shixin Hu,<sup>d</sup> Jinbo Yang,<sup>b</sup> ShuZhou Li,<sup>c</sup> Song Gao,<sup>e,f</sup> and Yanglong Hou<sup>\*a</sup>

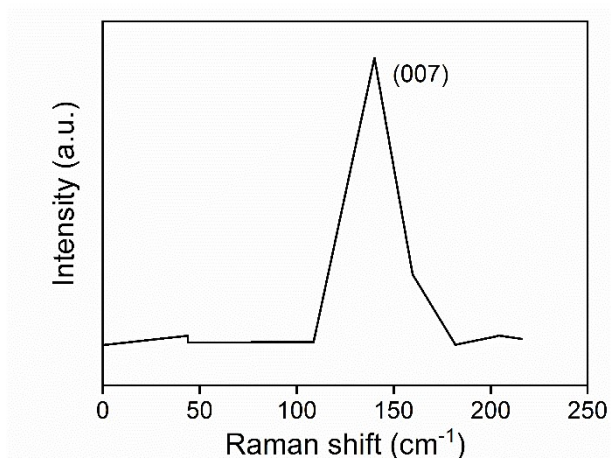

**Fig. S1** The first-principles Raman investigation of hexagonal FeSe with five-unit-cell thickness.

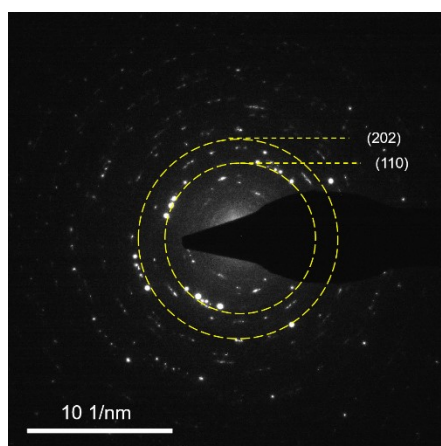

**Fig. S2** The SAED patterns of hexagonal FeSe nanosheets.

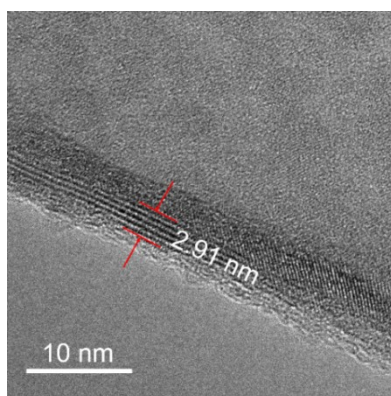

**Fig. S3** HRTEM image of the rolled-up edge of 2D hexagonal FeSe.

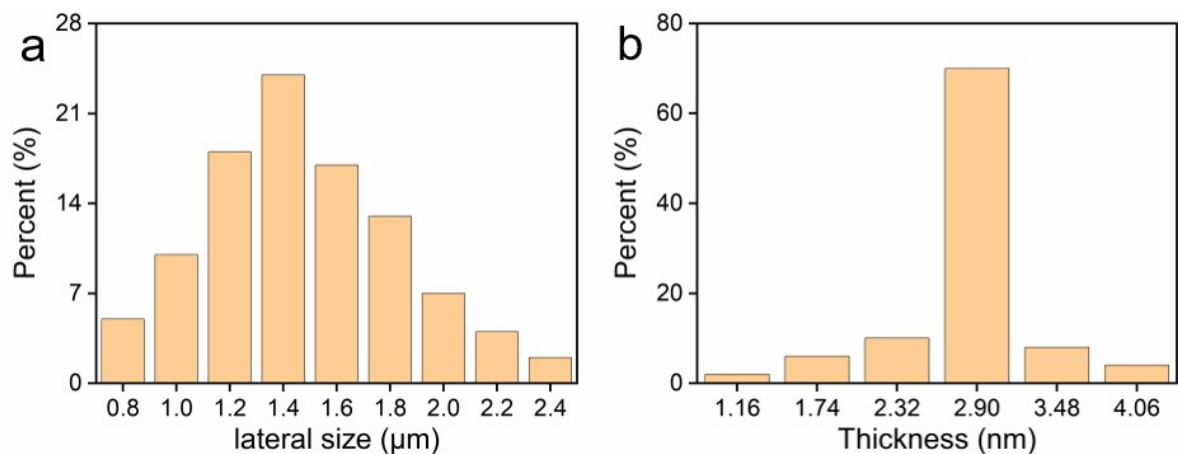

**Fig. S4** (a) lateral size and (b) thickness distribution of 2D hexagonal FeSe.

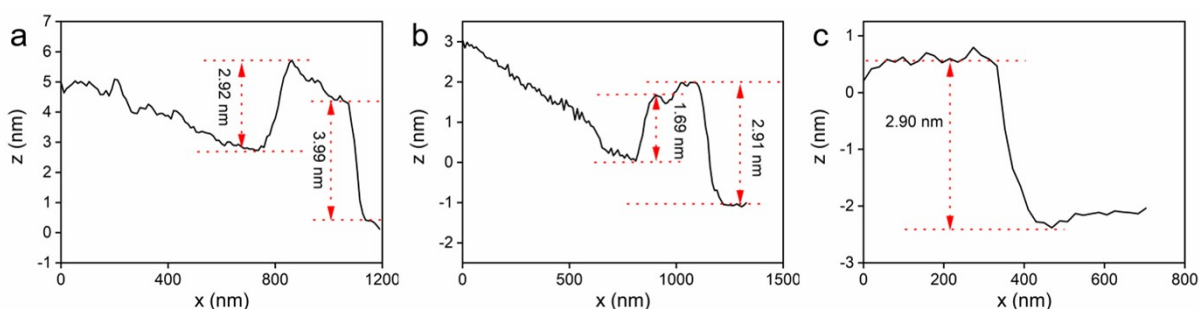

**Fig. S5** Line profile scan of hexagonal FeSe nanosheets.

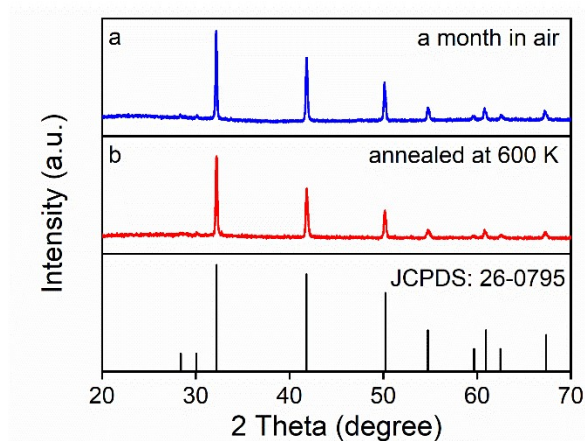

**Fig. S6** XRD patterns of the 2D hexagonal FeSe (a) exposed to air for a month and (b) heat-treated at 600K under the  $N_2$  atmosphere for 1 h.

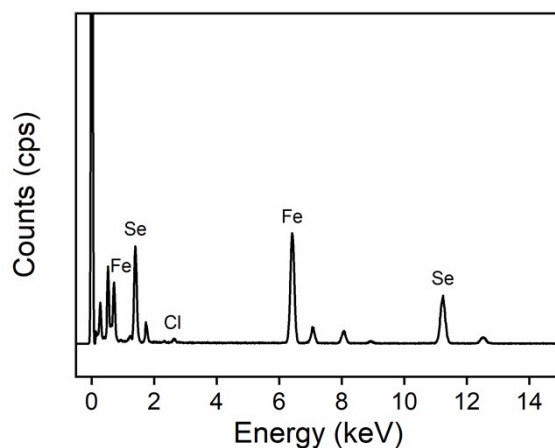

**Fig. S7** EDX Spectra of the 2D hexagonal FeSe.

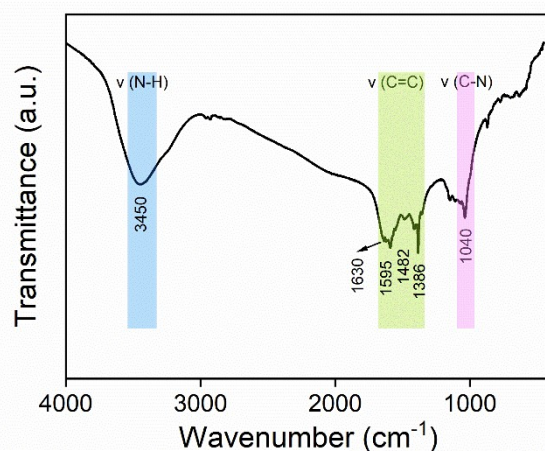

**Fig. S8** FT-IR spectroscopy of the 2D hexagonal FeSe.

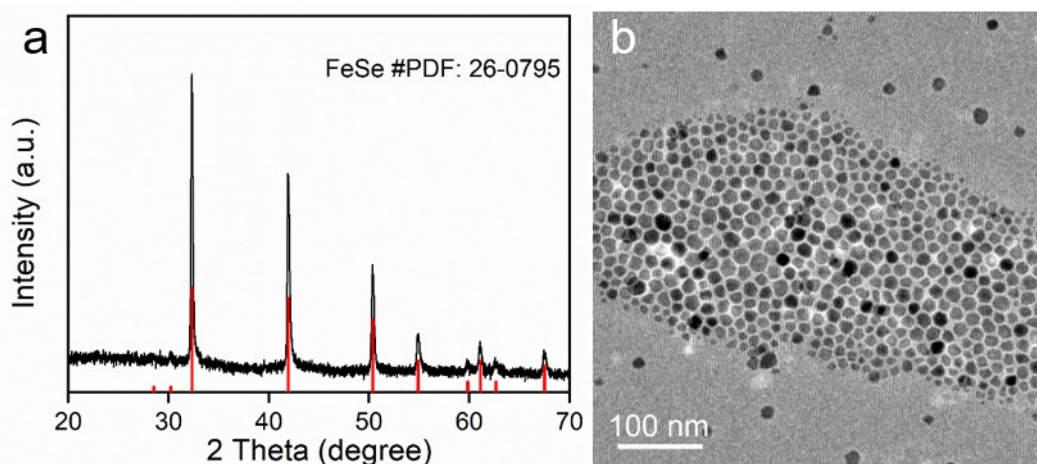

**Fig. S9** (a) XRD pattern and (b) TEM image of hexagonal FeSe nanoparticles obtained by the reaction between ODE-Se complex and  $\text{Fe}(\text{acac})_2$ .

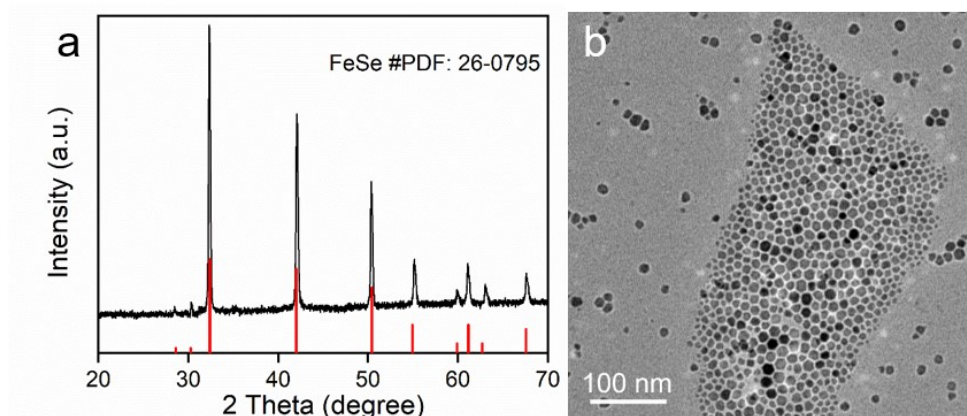

**Fig. S10** (a) XRD pattern and (b) TEM image of hexagonal FeSe nanoparticles obtained by the reaction between ODE-Se complex and  $\text{Fe}(\text{acac})_2$  with the presence of  $\text{Cl}^-$ .

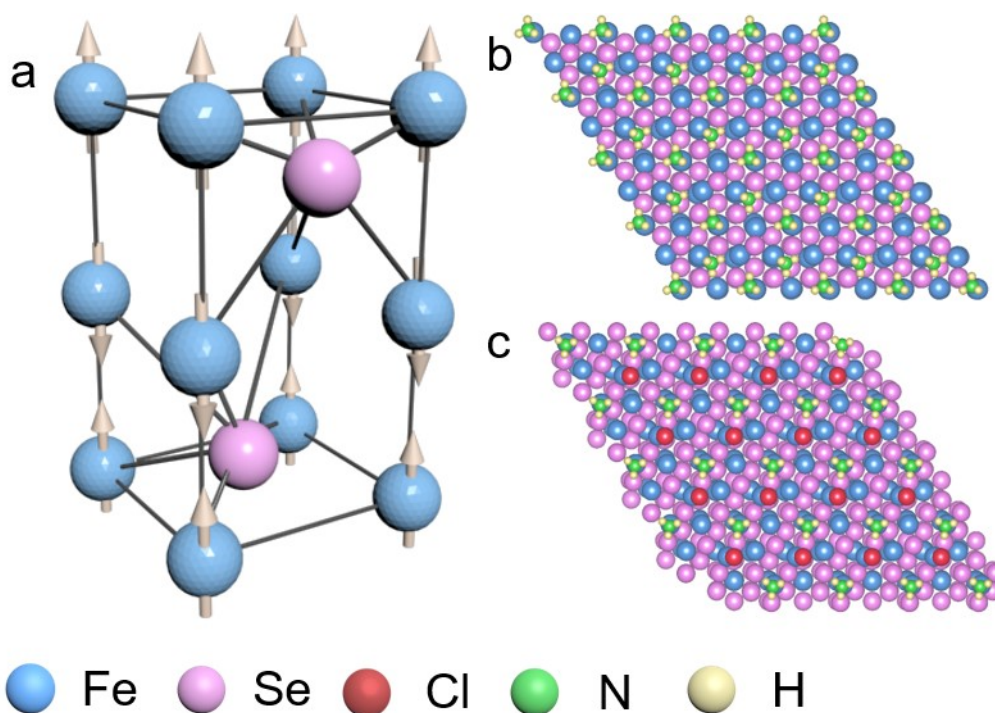

**Fig. S11** (a) Crystal structure of hexagonal FeSe. The upward and downward arrows represent spin-up and spin-down states, respectively. Calculation model of (b)  $\text{NH}_3$ , as well as (c)  $\text{NH}_3$  and  $\text{Cl}^-$  adsorption on (001) facet.

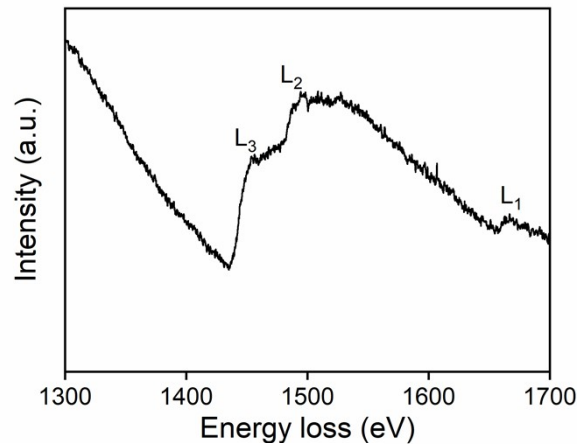

**Fig. S12** Se L-edge EELS of 2D ultrathin hexagonal FeSe.

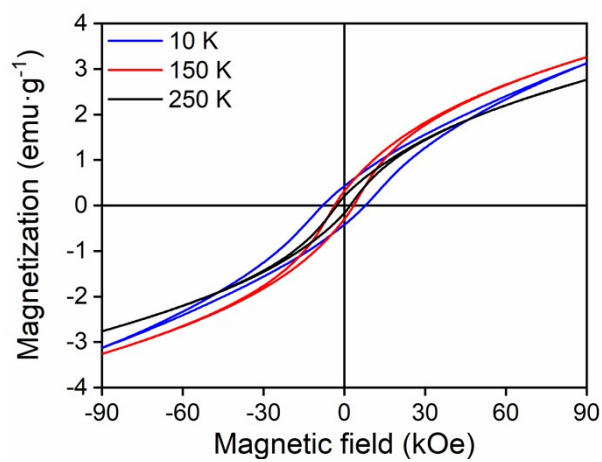

**Fig. S13** Hysteresis loops of 2D ultrathin hexagonal FeSe between 10 and 250 K.

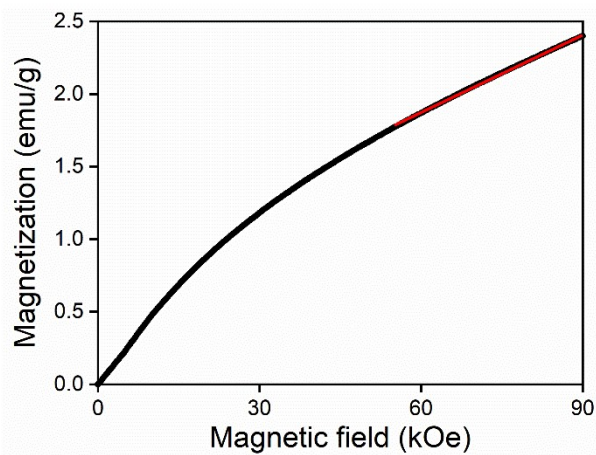

**Fig. S14** Initial magnetization curve of 2D ultrathin hexagonal FeSe at 300 K.

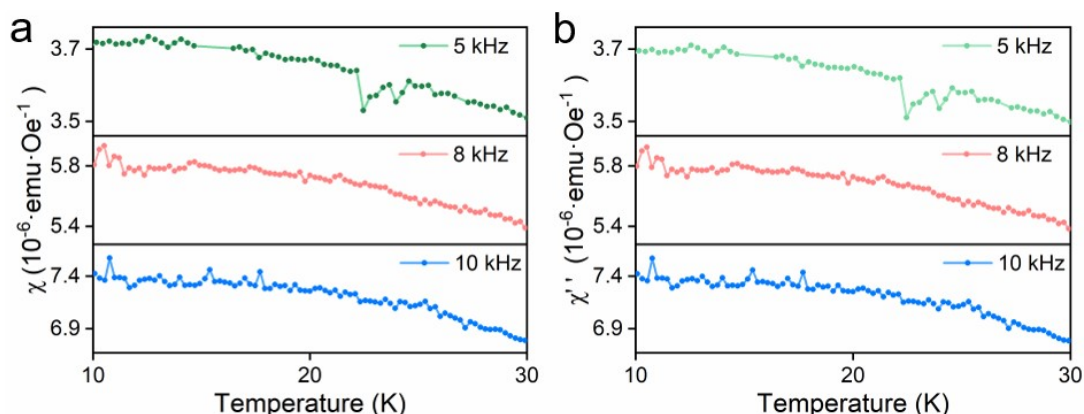

**Fig. S15** Temperature dependence of (a) ac susceptibility,  $\chi$ , and (b) out-of-plane component,  $\chi''$ , of 2D ultrathin hexagonal FeSe at different frequencies.

**Table S1** Isomer shift, quadrupolar splitting, and magnetic field of as-synthesized hexagonal FeSe nanosheets

| Temperature | Fe site | Area (%) | Amplitude/Standard deviation | Isomer shift ( $\text{mm}\cdot\text{s}^{-1}$ ) | Quadrupolar splitting ( $\text{mm}\cdot\text{s}^{-1}$ ) | Magnetic field (T) |
|-------------|---------|----------|------------------------------|------------------------------------------------|---------------------------------------------------------|--------------------|
| 300 K       | 1       | 28.12    | 3834.21/258                  | 0.601                                          | -0.151                                                  | 22.290             |
|             | 2       | 26.98    | 3909.35/258                  | 0.852                                          | 0.282                                                   | 22.125             |
|             | 3       | 44.90    | 35756.52/531                 | 0.351                                          | 0.763                                                   | 0                  |
| 30 K        | 1       | 16.83    | 1371.29/130                  | 0.229                                          | -0.181                                                  | 42.162             |
|             | 2       | 10.65    | 867.99/165                   | 0.753                                          | 0.136                                                   | 42.699             |
|             | 3       | 44.49    | 3625.78/120                  | 0.860                                          | -0.204                                                  | 28.689             |
|             | 4       | 22.52    | 1835.55/237                  | 0.844                                          | -0.286                                                  | 24.447             |
|             | 5       | 5.51     | 2693.55/453                  | 0.750                                          | 1.292                                                   | 0                  |
| 10 K        | 1       | 8.24     | 1426.08/140                  | 0.202                                          | -0.204                                                  | 49.535             |
|             | 2       | 23.85    | 2007.22/96.1                 | 0.535                                          | 0.084                                                   | 49.568             |
|             | 3       | 9.84     | 847.78/89.5                  | 0.878                                          | -0.832                                                  | 45.041             |
|             | 4       | 32.29    | 2956.79/143                  | 0.860                                          | -0.232                                                  | 28.486             |
|             | 5       | 25.78    | 2031.25/126                  | 0.773                                          | -0.391                                                  | 25.163             |

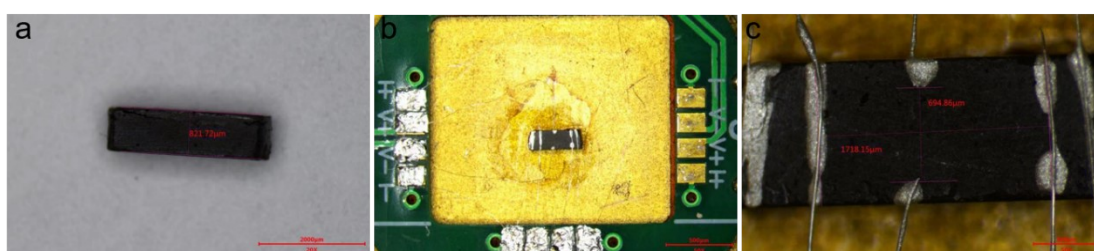

**Fig. S16** (a) The thickness of the pellet. (b) and (c) pressed pellets device of as-synthesized FeSe nanosheets for variable-temperature conductivity measurements by *van der Pauw* method with different magnifications.

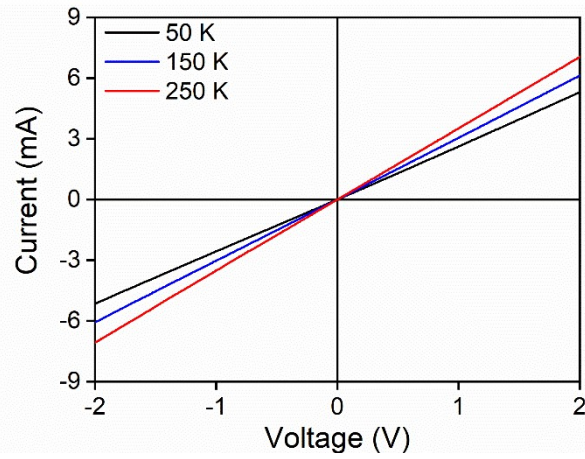

**Fig. S17** I-V curves of 2D ultrathin hexagonal FeSe at different temperatures.

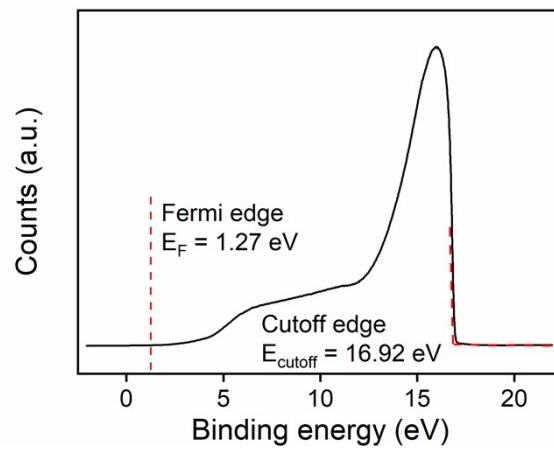

**Fig. S18** UPS spectra of 2D hexagonal FeSe.
